# Supplementary material for: Delayed heart rate recovery and its variability in fitness functional training compared to endurance athletes: a cross-sectional analysis
Source: PeerJ. 2026 Jan 5;14:e20335. doi: 10.7717/peerj.20335 (PMC12782030; doi:10.7717/peerj.20335)
Supplement: Supplemental Information 1 [file peerj-14-20335-s001.xlsx]

## Sheet: Planilha2
ENGLISH-LANGUEGE CODEBOOK:
BMI	Body Mass Index
HR ort	Orthostatic Heart Rate
SBP ort	Orthostatic Systolic Blood Pressure
DBP ort	Orthostatic Diastolic Blood Pressure
RR ort	Orthostatic Respiratory Rate
LF ort	Orthostatic Low Frequency
HR/LF (ort)	Orthostatic Heart rate/Low Frequency
SD1 ort	Orthostatic Standard Deviation 1
SD2 ort	Orthostatic Standard Deviation 2
HR peak	Peak Heart Rate
VO2 peak Relat	Relative Peak Oxygen Uptake
R peak	Respiratory Quotient
SD1 peak	Peak Standard Deviation 1
SD2 peak	Peak Standard Deviation 2
LF peak	Peak Low Frequency
HR/LF (peak)	Peak Heart rate/Low Frequency
TT	Total Time
HRR per si	Recovery heart rate
HRR abs	Absolute recovery heart rate
% HRR	Relative recovery heart rate
SD1	Standard Deviation 1
SD2	Standard Deviation 2
LF	Low Frequency
HR/LF	Heart rate/Low Frequency
	Group	Age (year)	Body mass (kg)	Stature (m)	BMI (kg/m2)	HR ort (bpm)	SBP ort (mmHg)	DBP ort (mmHg)	RR ort (ms)	LF ort (ms2)	HR/LF (ort)	SD1 ort (ms)	SD2 ort (ms)	HR peak (bpm)	VO2 peak Relat [mL(kg,min)-1]	R peak	SD1 peak (ms)	SD2 peak (ms)	LF peak (ms2)	HR/LF (peak)	TT (s)	HRR 1 per si (bpm)	HRR 2 per si (bpm)	HRR 3 per si (bpm)	HRR 4 per si (bpm)	HRR 5 per si (bpm)	HRRabs 1 (bpm)	HRR abs 2 (bpm)	HRR abs 3 (bpm)	HRR abs 4 (bpm)	HRR abs 5 (bpm)	% HRR 1	% HRR 2	% HRR 3	% HRR 4	% HRR 5	SD1 1min (ms)	SD1 2min (ms)	SD1 3min (ms)	SD1 4min (ms)	SD1 5min (ms)	SD2 1min (ms)	SD2 2min (ms)	SD2 3min (ms)	SD2 4min (ms)	SD2 5min (ms)	LF 1min (ms2)	LF 2min (ms2)	LF 3min (ms2)
	Control Group	32	92.5	1.84	27.3216	84	122	78	11	535	0.157009	13.8	40	192	33.91	1.22	1.8	1.1	0.078	2461.54	512	159	142	129	125	124	33	50	63	67	68	17.1875	26.0417	32.8125	34.8958	35.4167	2.5	7.2	6.8	6.7	6.6	2.8	5.4	5.5	5.5	5.5	0.29077	1.1709	2.3939
	Control Group	32	60.5	1.7	20.9343	77	115	74	17	559	0.137746	12.9	37.9	179	39.74	1.39	3	2.4	0.138	1297.1	502	159	144	132	127	121	20	35	47	52	58	11.1732	19.5531	26.257	29.0503	32.4022	3.2	3	2.8	2.7	2.6	4.4	3.9	3.9	4.6	4.8	5.4184	1.7933	2.156
	Control Group	36	78.5	1.8	24.2284	69	121	72	17	390	0.176923	12.7	36	192	44.85	1.13	3.1	2.8	0.132	1454.55	787	160	131	117	104	104	32	61	75	88	88	16.6667	31.7708	39.0625	45.8333	45.8333	2.9	3.2	3.5	4.7	5.3	2.3	3.8	4.696	5.296	6.4	0.33446	2.4925	6.8662
	Control Group	33	72.5	1.75	23.6735	73	131	95	15	650	0.112308	16.6	42.8	176	51.86	1.16	2.5	2.3	0.218	807.339	802	154	133	122	118	116	22	43	54	58	60	12.5	24.4318	30.6818	32.9545	34.0909	2.5	2.5	2.4	2.4	2.3	3.2	3.3	3.3	3.9	4.1	4.7181	1.8651	2.7899
	Control Group	32	92.5	1.8	28.5494	86	139	93	23	934	0.0920771	11.6	40.9	188	35.17	1.07	4	3.2	1.126	166.963	568	148	124	121	115	105	40	64	67	73	83	21.2766	34.0426	35.6383	38.8298	44.1489	3.2	3.9	4.3	5.2	5.5	7.5	8.4	9.8	11.1	10.9	31.348	40.622	30.148
	Control Group	27	61.5	1.62	23.4339	65	118	68	9	3820	0.0170157	25.2	86.5	183	59	1.21	2.4	1.7	0.155	1180.65	738	149	136	124	116	111	34	47	59	67	72	18.5792	25.6831	32.2404	36.612	39.3443	1.6	1.6	2.9	3	3	2.4	3.4	4.9	4.8	5	0.36528	5.7068	7.8422
	Control Group	27	84	1.84	24.811	74	115	76	18	690	0.107246	19.6	55.4	194	51.99	1.27	2.6	1.8	0.045	4311.11	633	175	154	144	138	135	19	40	50	56	59	9.79381	20.6186	25.7732	28.866	30.4124	2.3	2.7	2.9	2.8	2.8	2	2.6	3.2	3.5	3.5	0.2803	0.49376	1.119
	Control Group	28	63.5	1.76	20.4997	86	120	84	17	1769	0.048615	17.5	63.6	191	46.49	1.21	3.3	3.1	0.811	235.512	903	132	110	99	112	95	59	81	92	79	96	30.8901	42.4084	48.1675	41.3613	50.2618	3.4	5.9	6.4	6.2	6.2	5.7	15.7	19.2	18.1	18.7	3.0513	38.668	194
	Control Group	25	77.6	1.75	25.3388	74	129	81	12	1572	0.0470738	26	69.5	189	53.63	1.08	3.4	2.7	0.009	21000	609	165	138	125	121	114	24	51	64	68	75	12.6984	26.9841	33.8624	35.9788	39.6825	1.6	2.3	2.2	2.2	2.2	1.9	4.2	4.5	5.4	5.496	0.68185	2.7459	8.1615
	Control Group	30	74	1.78	23.3556	62	117	77	11	1496	0.0414439	19	70.3	180	46.4	1.25	2.1	2	0.024	7500	722	145	120	109	106	103	35	60	71	74	77	19.4444	33.3333	39.4444	41.1111	42.7778	1.7	1.7	1.9	2.1	2.2	2.6	3	4	4.7	5.3	0.7166	1.9993	2.7131
	Control Group	25	60	1.72	20.2812	75	135	88	16	661	0.113464	14.9	49.3	184	51.57	1.09	2.9	2.4	0.554	332.13	617	144	122	111	104	108	40	62	73	80	76	21.7391	33.6957	39.6739	43.4783	41.3043	1.8	2	2.2	2.4	2.6	4.6	5.996	7.8	9	8.8	7.5764	10.758	21.117
	Control Group	36	80	1.82	24.1517	69	112	69	9	1736	0.0397465	19.8	61.2	180	41.83	1.14	1.8	1.4	0.066	2727.27	566	161	134	116	111	110	19	46	64	69	70	10.5556	25.5556	35.5556	38.3333	38.8889	1.8	1.9	2.2	2.3	2.6	1.8	4.1	5.9	6.8	8.3	0.52293	3.6441	13.474
	Control Group	25	69	1.9	19.1136	78	130	83	10	228	0.342105	7.2	24	175	49.69	1.14	5.1	3.1	0.069	2536.23	512	141	123	110	102	95	34	52	65	73	80	19.4286	29.7143	37.1429	41.7143	45.7143	3	2.4	2.3	3.9	3.9	2.3	3.4	3.9	5.6	5.7	1.2949	2.1356	5.1788
	Control Group	32	78	1.72	26.3656	76	124	88	12	1621	0.0468846	16.1	58	183	38.88	1.04	2.7	3	0.903	202.658	722	152	132	120	115	119	31	51	63	68	64	16.9399	27.8689	34.4262	37.1585	34.9727	2.1	2.2	2.5	2.6	2.6	2.7	3	4	4.5	5	1.4158	2.5056	3.5445
	Control Group	26	83	1.77	26.493	54	131	83	14	404	0.133663	32.7	46.4	186	43.2	1.15	3.4	2.6	0.047	3957.45	740	150	123	108	107	100	36	63	78	79	86	19.3548	33.871	41.9355	42.4731	46.2366	2.5	2.7	2.9	2.8	3.4	2.9	4.5	5.4	5.5	6.1	0.40846	4.588	9.2104
	Endurance Group	31	61	1.7	21.1073	67	110	60	17	905	0.0740331	19.7	44.2	184	61.9	1.1	3.5	2.8	0.436	422.018	509	153	125	113	111	111	31	59	71	73	73	16.8478	32.0652	38.587	39.6739	39.6739	3.4	4.6	4.3	4.3	4.5	3.4	5.4	5.3	5.5	5.6	1.2885	1.0115	5.6661
	Endurance Group	36	88	1.81	26.8612	61	140	87	18	265	0.230189	20	34.9	182	47.25	1.18	12.8	25.1	0.967	188.211	631	155	129	116	113	107	27	53	66	69	75	14.8352	29.1209	36.2637	37.9121	41.2088	5.9	4.6	4.1	3.7	3.5	7.7	6.1	5.8	5.7	5.4	1.491	2.2735	3.8087
	Endurance Group	31	84.2	1.85	24.6019	62	130	90	17	1481	0.0418636	22.6	52.1	192	40.29	1.23	3.2	2.2	0.3	640	602	169	131	119	112	110	23	61	73	80	82	11.9792	31.7708	38.0208	41.6667	42.7083	2.6	2.3	2.4	2.6	2.9	2	3	4.1	4.9	5.4	0.26725	0.55023	4.0531
	Endurance Group	34	70.3	1.64	26.1377	63	135	97	19	619	0.101777	13.8	37.1	183	51.22	1.23	3.6	3.3	0.423	432.624	565	151	117	105	105	103	32	66	78	78	80	17.4863	36.0656	42.623	42.623	43.7158	2.7	3.4	3.7	6.3	6	3	5.495	6.6	8	8.1	0.33719	7.4864	17.957
	Endurance Group	27	65.5	1.71	22.4001	68	110	75	13	2867	0.0237182	31.6	85.8	192	51.5	1.25	2.2	1.9	0.441	435.374	686	173	137	119	111	111	19	55	73	81	81	9.89583	28.6458	38.0208	42.1875	42.1875	2.8	2.5	2.8	2.9	3.2	2.2	2.5	3	3.6	4.4	0.12393	0.97953	2.782
	Endurance Group	37	75.8	1.8	23.3951	57	120	90	15	2320	0.024569	33.2	76.2	171	48.45	1.2	3.3	2.7	0.287	595.819	488	139	112	100	100	94	32	59	71	71	77	18.7135	34.5029	41.5205	41.5205	45.0292	4.8	4.8	5.3	5.3	5.2	6.2	8.8	11.9	11.9	11.7	11.636	22.623	51.317
	Endurance Group	27	73.2	1.73	24.4579	58	120	70	16	1584	0.0366162	25	63.8	179	53.94	1.2	2.9	1.9	0.344	520.349	620	139	115	104	105	106	40	64	75	74	73	22.3464	35.7542	41.8994	41.3408	40.7821	4.1	4.9	4.8	4.6	4.4	3.1	7.2	8.5	8.2	8.1	1.0833	17.575	45.251
	Endurance Group	36	79.1	1.76	25.5359	59	130	80	15	2281	0.0258658	39.6	75.1	185	45.25	1.25	2.5	2	0.434	426.267	607	157	131	124	115	120	28	54	61	70	65	15.1351	29.1892	32.973	37.8378	35.1351	2.5	2.9	3.2	3.4	3.5	2.2	3.7	4.7	5.2	5.2	0.30998	3.4443	10.736
	Endurance Group	36	81.3	1.82	24.5441	67	130	90	17	1244	0.0538585	18.3	55.3	171	48.38	1.22	1.9	1.6	0.481	355.509	552	140	120	106	103	100	31	51	65	68	71	18.1287	29.8246	38.0117	39.7661	41.5205	2.099	2.2	3.2	4.7	5	3.4	4.2	5.3	5.8	6	0.21759	8.1408	7.5504
	Endurance Group	33	70.6	1.72	23.8643	74	130	90	14	4417	0.0167535	23.8	89.7	179	54.83	1.2	3.4	2.6	0.502	356.574	600	149	120	108	105	103	30	59	71	74	76	16.7598	32.9609	39.6648	41.3408	42.4581	4.4	4.2	4	4.3	4.4	2.9	5.3	6.7	6.8	6.8	0.26716	4.3589	18.189
	Endurance Group	36	73.3	1.71	25.0675	64	131	95	12	1029	0.0621963	25.7	55.4	176	48.71	1.17	3.3	1.7	0.378	465.608	565	138	108	103	100	93	38	68	73	76	83	21.5909	38.6364	41.4773	43.1818	47.1591	4	9.6	15.2	15	14.8	3.7	17.6	30.2	30.2	29.4	0.65571	67.339	225.04
	Endurance Group	34	66	1.78	20.8307	89	130	90	18	993	0.0896274	8.8	46.5	175	54.86	1.13	4.2	3	0.239	732.218	603	142	116	101	100	92	33	59	74	75	83	18.8571	33.7143	42.2857	42.8571	47.4286	4	4.3	4.4	7.6	10.8	3.595	5.1	9	11.7	13.8	0.30102	6.1521	30.616
	Endurance Group	30	67	1.68	23.7387	46	130	80	13	2411	0.0190792	78.7	101.1	180	60.21	1.23	3.7	2.6	0.13	1384.62	683	151	117	105	100	96	29	63	75	80	84	16.1111	35	41.6667	44.4444	46.6667	3.9	3.6	3.6	3.8	4.2	3.7	5	6.2	6.7	7.2	0.34677	4.3732	12.499
	Endurance Group	35	75.8	1.81	23.1373	77	120	70	16	831	0.0926594	13.6	46.6	174	49.55	1.13	3.7	3	0.655	265.649	490	135	113	102	100	96	39	61	72	74	78	22.4138	35.0575	41.3793	42.5287	44.8276	2.4	2.7	3	3.3	3.4	2.7	4.9	5.3	6.3	6.8	2.2906	11.451	13.85
	Endurance Group	30	74.3	1.89	20.8001	64	125	89	10	3506	0.0182544	25.2	71.6	184	50.34	1.22	3.7	2.7	0.27	681.481	548	165	144	127	120	120	19	40	57	64	64	10.3261	21.7391	30.9783	34.7826	34.7826	2.8	2.5	3.3	3.3	3.4	2.2	2.9	3.4	3.6	3.9	0.25091	2.0218	2.0729
	Endurance Group	33	85.6	1.78	27.0168	72	130	80	16	703	0.102418	28.6	51.6	186	40.5	1.24	3.1	2.2	0.312	596.154	487	162	132	118	112	110	24	54	68	74	76	12.9032	29.0323	36.5591	39.7849	40.8602	3.2	4.8	4.4	4.3	4.3	2.1	3.3	3.4	4.1	4.8	0.11923	1.4243	1.7871
	Endurance Group	31	65.3	1.76	21.0808	57	130	85	11	539	0.105751	27.1	40.4	185	53.48	1.24	2.3	2	0.585	316.239	545	152	117	108	104	101	33	68	77	81	84	17.8378	36.7568	41.6216	43.7838	45.4054	2.1	2.3	5.7	6.4	6.1	2.3	4.7	9	11.1	10.9	0.62611	4.5528	16.368
	Endurance Group	30	69	1.74	22.7903	81	130	91	17	3840	0.0210938	21.2	81.7	190	52.96	1.24	2.5	3.8	0.929	204.521	553	130	111	105	106	103	60	79	85	84	87	31.5789	41.5789	44.7368	44.2105	45.7895	4.4	4	4.3	4.7	5	8.6	8.6	9.4	9.1	9.3	18.245	28.672	30.362
	Endurance Group	32	72	1.78	22.7244	64	130	85	12	784	0.0816327	17.4	43.5	182	52.77	1.2	3.2	2.6	0.204	892.157	614	146	117	106	104	107	36	65	76	78	75	19.7802	35.7143	41.7582	42.8571	41.2088	3.5	3.6	3.7	3.8	3.9	3.7	4.3	5.1	5.6	6	1.0808	5.8999	5.8166
	Endurance Group	32	74.5	1.78	23.5134	56	130	97	10	9484	0.00590468	68.1	163.4	181	45.06	1.25	2.7	1.7	0.294	615.646	558	139	114	99	99	100	42	67	82	82	81	23.2044	37.0166	45.3039	45.3039	44.7514	3.5	6.5	6.7	7.2	7.4	6.4	14.7	15.8	18.8	19.1	13.167	39.466	122.08
	Endurance Group	34	81.3	1.84	24.0135	68	130	80	15	634	0.107256	12.4	46.6	179	46.96	1.14	2.1	1.7	0.235	761.702	494	153	122	112	107	102	26	57	67	72	77	14.5251	31.8436	37.4302	40.2235	43.0168	3	2.9	3.8	3.8	3.7	2.5	4.7	8.8	8.4	8.2	0.56254	5.0017	19.078
	Endurance Group	34	62.7	1.68	22.2151	61	130	80	23	1383	0.044107	38.3	73.2	197	53.24	1.22	2	1.8	0.393	501.272	623	168	141	131	128	124	29	56	66	69	73	14.7208	28.4264	33.5025	35.0254	37.0558	2.9	2.9	2.795	2.7	2.7	3.3	4.5	4.8	4.6	5.3	1.1543	7.9989	10.28
	Endurance Group	32	67.8	1.74	22.394	81	130	90	15	258	0.313953	12.3	31.9	198	53.97	1.18	2.3	1.7	0.286	692.308	674	182	165	146	135	130	16	33	52	63	68	8.08081	16.6667	26.2626	31.8182	34.3434	2.2	2.2	2.1	2.3	2.3	2	2.3	4.3	4.3	4.2	0.059107	1.2276	1.1422
	Fitness Functional Group	29	77	1.81	23.5036	73	120	89	20	397	0.183879	13.5	48.5	185	46.36	1.35	6.7	2.6	0.238	777.311	629	174	142	134	122	120	11	43	51	63	65	5.94595	23.2432	27.5676	34.0541	35.1351	7.2	6.8	6.9	6.8	6.8	4.3	5	5.4	5.4	5.4	0.1386	0.37501	3.7384
	Fitness Functional Group	27	74.7	1.78	23.5766	78	130	70	15	884	0.0882353	26.7	57.1	192	45.46	1.23	2.6	1.8	0.219	876.712	691	171	149	132	124	119	21	43	60	68	73	10.9375	22.3958	31.25	35.4167	38.0208	2.5	2.2	2.2	2.4	2.5	1.6	2.1	3.1	4.1	4.5	0.10543	0.44847	1.7043
	Fitness Functional Group	39	73.8	1.74	24.3757	62	120	70	12	2475	0.0250505	38.4	69.1	166	40.3	1.26	2.8	3.2	0.722	229.917	527	141	117	104	101	96	25	49	62	65	70	15.0602	29.5181	37.3494	39.1566	42.1687	3.2	3.4	3.6	3.9	4.2	2.4	4.9	5.5	6.2	6.3	0.27683	0.70046	8.2684
	Fitness Functional Group	34	85.1	1.81	25.976	68	130	90	22	356	0.191011	42	37.1	179	41.54	1.28	1.9	1.3	0.498	359.438	510	167	146	133	119	116	12	33	46	60	63	6.70391	18.4358	25.6983	33.5196	35.1955	1.8	1.7	2.6	3.8	4.8	1.1	1.4	3.4	5.1	8.1	0.027145	0.12097	0.7514
	Fitness Functional Group	35	84.3	1.73	28.1667	54	130	90	19	1365	0.0395604	48.3	61.4	172	44.85	1.37	3	2.4	0.309	556.634	488	144	120	101	93	94	28	52	71	79	78	16.2791	30.2326	41.2791	45.9302	45.3488	4.1	4.6	5.4	5.7	5.7	2.8	4.6	5.5	6.2	6.8	0.22446	5.131	7.8855
	Fitness Functional Group	27	70.3	1.74	23.2197	74	129	81	13	1189	0.0622372	20.7	58.2	185	48.12	1.26	5.5	3.5	0.174	1063.22	505	163	146	135	129	123	22	39	50	56	62	11.8919	21.0811	27.027	30.2703	33.5135	3.3	3.5	3.9	4	4.2	2.4	3	4.8	5.4	6.7	0.24837	0.57134	1.0427
	Fitness Functional Group	33	79	1.74	26.0933	76	110	72	15	1203	0.0631754	16.9	58.4	195	50.73	1.5	2.2	1.8	0.517	377.176	569	154	123	111	112	110	41	72	84	83	85	21.0256	36.9231	43.0769	42.5641	43.5897	3.4	4.7	4.5	4.2	3.9	2.8	8.5	8.7	8.4	8	0.76516	17.666	38.149
	Fitness Functional Group	33	89	1.8	27.4691	59	140	100	18	958	0.0615866	29.8	54.2	181	50.55	1.2	2.9	2.1	0.336	538.69	549	149	126	117	108	103	32	55	64	73	78	17.6796	30.3867	35.3591	40.3315	43.0939	1.7	2.2	2.6	3.3	4.1	2	2.4	3.5	4.6	5.1	1.1669	1.3176	1.3578
	Fitness Functional Group	34	88	1.78	27.7743	85	135	98	10	648	0.131173	14.8	41.1	180	61.98	1.27	2.8	1.9	0.19	947.368	545	166	153	144	133	136	14	27	36	47	44	7.77778	15	20	26.1111	24.4444	3.2	3.5	3.4	3.4	3.2	2.7	3	3	3.5	3.8	0.074439	0.33661	0.33121
	Fitness Functional Group	29	84.2	1.78	26.5749	66	130	90	11	220	0.3	10.3	30.6	190	47.35	1.43	2.8	1.9	0.235	808.511	565	169	153	139	131	128	21	37	51	59	62	11.0526	19.4737	26.8421	31.0526	32.6316	2.3	2.2	2.3	2.5	2.5	2.1	3.8	3.8	7.9	7.6	0.17271	6.193	4.9809
	Fitness Functional Group	35	66	1.68	23.3844	63	120	70	22	4168	0.0151152	37.2	88	192	50.82	1.34	2.4	1.6	0.219	876.712	508	174	154	145	138	135	18	38	47	54	57	9.375	19.7917	24.4792	28.125	29.6875	2.7	2.6	2.5	2.5	2.6	2.2	2.1	3.1	4	4.3	0.39328	0.75553	0.81137
	Fitness Functional Group	33	81	1.82	24.4536	88	120	80	9	1412	0.0623229	27.3	52.4	185	43.85	1.19	3	1.4	0.177	1045.2	559	157	128	120	116	112	28	57	65	69	73	15.1351	30.8108	35.1351	37.2973	39.4595	4.6	4.6	4.3	9.2	9.2	4.5	4.5	4.3	6.9	8.1	0.30208	2.5758	1.8053
	Fitness Functional Group	28	85.7	2	21.425	81	120	80	14	1072	0.0755597	19.5	52.7	175	45.95	1.24	3.8	2.8	0.435	402.299	503	158	135	123	119	115	17	40	52	56	60	9.71429	22.8571	29.7143	32	34.2857	3.6	3.4	3.5	3.5	3.4	3.2	3.5	3.9	3.9	3.9	0.14185	0.2311	2.2586
	Fitness Functional Group	32	79	1.73	26.3958	62	118	80	9	1080	0.0574074	25.2	61.9	169	54.56	1.47	2.1	2.1	0.607	278.418	502	134	118	106	104	102	35	51	63	65	67	20.7101	30.1775	37.2781	38.4615	39.645	3	5.3	6.3	6.5	7	2.4	5.8	6.9	6.9	7.4	0.97197	5.3341	14.195
	Fitness Functional Group	26	78	1.73	26.0617	72	130	90	15	1899	0.0379147	41.4	75.2	185	42.41	1.23	2.7	3	0.473	391.121	548	156	137	129	125	120	29	48	56	60	65	15.6757	25.9459	30.2703	32.4324	35.1351	3.2	2.7	2.5	2.4	2.4	2.5	3.1	3.2	3.4	3.6	1.0538	2.7445	3.3825
[truncated: 7 more columns]
